# Supplementary material
Source: HighWire-hosted journal article supplement (https://svn.smart01.highwire.org/content/5/4/337)
Supplement: inline-supplementary-material-1 [file inline-supplementary-material-1.pdf]

| A                                               |                                                                         | B1 DIAGNOSTIC TESTS/MRI                               |                                                                                                                                         |
|-------------------------------------------------|-------------------------------------------------------------------------|-------------------------------------------------------|-----------------------------------------------------------------------------------------------------------------------------------------|
| A1 HISTORY/EMBOLI (Circle one or more response) |                                                                         | B1 DIAGNOSTIC TESTS/MRI (Circle one or more response) |                                                                                                                                         |
| 1.                                              | High-Risk Sources for Emboli                                            | 1.                                                    | Infarct Characteristics                                                                                                                 |
| <input type="checkbox"/>                        | a Mechanical Prosthetic Heart Valve                                     | <input type="checkbox"/>                              | a Single Subcortical Infarct or a Infarct in the Territory of a Small Penetrating Artery that is $\leq 1.5$ cm in its Greatest Diameter |
| <input type="checkbox"/>                        | b Mitral Stenosis with Atrial Fibrillation                              | <input type="checkbox"/>                              | b Multiple Acute and Subacute Ischemic Lesions in either Right and Left Anterior or Anterior and Posterior Circulations or both         |
| <input type="checkbox"/>                        | c Atrial Fibrillation (other than lone atrial fibrillation)             | <input type="checkbox"/>                              | c Acute Unilateral Internal Watershed Infarcts                                                                                          |
| <input type="checkbox"/>                        | d Left Atrial / Atrial Appendage Thrombus                               | <input type="checkbox"/>                              | d Multiple Temporally Separate Infarcts Exclusively within the Territory of the Clinically Relevant Artery                              |
| <input type="checkbox"/>                        | e Sick Sinus Syndrome                                                   | <input type="checkbox"/>                              | e Negative for Acute Infarct(s)                                                                                                         |
| <input type="checkbox"/>                        | f Recent Myocardial Infarction (MI) (within 4 Weeks)                    | <input type="checkbox"/>                              | f Not Done                                                                                                                              |
| <input type="checkbox"/>                        | g Left Ventricular Thrombus                                             |                                                       |                                                                                                                                         |
| <input type="checkbox"/>                        | h Dilated Cardiomyopathy                                                |                                                       |                                                                                                                                         |
| <input type="checkbox"/>                        | i Akinetic Left Ventricular Segment                                     |                                                       |                                                                                                                                         |
| <input type="checkbox"/>                        | j Atrial Myxoma                                                         |                                                       |                                                                                                                                         |
| <input type="checkbox"/>                        | k Infective Endocarditis                                                |                                                       |                                                                                                                                         |
| 2.                                              | Medium-Risk Source for Emboli                                           |                                                       | B2 DIAGNOSTIC TESTS/INTRACRANIAL ARTERY EVALUATION (Circle one or more response)                                                        |
| <input type="checkbox"/>                        | a Mitral Valve Prolapse                                                 | 1.                                                    | TESTS                                                                                                                                   |
| <input type="checkbox"/>                        | b Mitral Annulus Calcification                                          | <input type="checkbox"/>                              | a MRA                                                                                                                                   |
| <input type="checkbox"/>                        | c Mitral Stenosis without Atrial Fibrillation                           | <input type="checkbox"/>                              | b CTA                                                                                                                                   |
| <input type="checkbox"/>                        | d Atrial Septal Aneurysm                                                | <input type="checkbox"/>                              | c DSA                                                                                                                                   |
| <input type="checkbox"/>                        | e Patent Foramen Ovale                                                  | 2.                                                    | RESULTS                                                                                                                                 |
| <input type="checkbox"/>                        | f Atrial Flutter                                                        | <input type="checkbox"/>                              | a $\geq 50\%$ Stenosis or Occlusion of Clinically Relevant Artery/Arteries                                                              |
| <input type="checkbox"/>                        | g Lone Atrial Fibrillation                                              | <input type="checkbox"/>                              | b Non or $<50\%$ Stenosis of Clinically Relevant Artery/Arteries                                                                        |
| <input type="checkbox"/>                        | h Bioprosthetic Heart Valve                                             |                                                       |                                                                                                                                         |
| <input type="checkbox"/>                        | i Nonbacterial Thrombotic Endocarditis                                  |                                                       |                                                                                                                                         |
| <input type="checkbox"/>                        | j Congestive Heart Failure                                              |                                                       |                                                                                                                                         |
| <input type="checkbox"/>                        | k MI $> 4$ weeks ago but $<6$ months ago                                |                                                       |                                                                                                                                         |
|                                                 | A2 HISTORY/LARGE VESSEL DISEASE (Circle one or more response)           |                                                       | B3 DIAGNOSTIC TESTS/EXTRACRANIAL ARTERY EVALUATION (Circle one or more response)                                                        |
| 1.                                              | Known Extracranial Large Vessel Disease                                 | 1.                                                    | TESTS                                                                                                                                   |
| <input type="checkbox"/>                        | a Appropriate for Symptoms                                              | <input type="checkbox"/>                              | a Carotid Doppler                                                                                                                       |
| <input type="checkbox"/>                        | b Not Appropriate for Symptoms                                          | <input type="checkbox"/>                              | b CTA                                                                                                                                   |
| 2.                                              | Known Intracranial Large Vessel Disease                                 | <input type="checkbox"/>                              | c CE-MRA                                                                                                                                |
| <input type="checkbox"/>                        | a Appropriate for Symptoms                                              | <input type="checkbox"/>                              | d DSA                                                                                                                                   |
| <input type="checkbox"/>                        | b Not Appropriate for Symptoms                                          | 2.                                                    | RESULTS                                                                                                                                 |
| 3.                                              | Prior Extra/Intracranial Imaging Completed                              | <input type="checkbox"/>                              | a $\geq 50\%$ Stenosis or Occlusion of Clinically Relevant Artery/Arteries                                                              |
| <input type="checkbox"/>                        | a No Prior Extra/Intracranial Imaging Completed                         | <input type="checkbox"/>                              | b Non or $<50\%$ Stenosis of Clinically Relevant Artery/Arteries                                                                        |
| <input type="checkbox"/>                        | b Negative Prior Extra/Intracranial Imaging Findings                    |                                                       |                                                                                                                                         |
|                                                 | A3 HISTORY/PRIOR SPECIALIZED TESTS (Circle one or more response)        |                                                       | B4 DIAGNOSTIC TESTS/ECHOCARDIOGRAPHY (Circle one or more response)                                                                      |
| 1.                                              | Intrinsic Disorder with Arterial Wall Abnormality                       | 1.                                                    | TESTS                                                                                                                                   |
| <input type="checkbox"/>                        | a Moyamoya Disease                                                      | <input type="checkbox"/>                              | a TTE                                                                                                                                   |
| <input type="checkbox"/>                        | b Nonatherosclerotic vasculopathy                                       | <input type="checkbox"/>                              | b TEE                                                                                                                                   |
| <input type="checkbox"/>                        | c Dissection                                                            | 2.                                                    | RESULTS/HIGH-RISK SOURCE(S) for EMBOLI                                                                                                  |
| 2.                                              | Iatrogenic Injury                                                       | <input type="checkbox"/>                              | a Mechanical Prosthetic Heart Valve                                                                                                     |
| <input type="checkbox"/>                        | a Injury Caused by Endovascular Treatment to Clinically Relevant Artery | <input type="checkbox"/>                              | b Mitral Stenosis with Atrial Fibrillation*                                                                                             |
| 3.                                              | Disorders of Blood Composition                                          | <input type="checkbox"/>                              | c Left Atrial / Atrial Appendage Thrombus                                                                                               |
| <input type="checkbox"/>                        | a Disorder of Hemostatic System                                         | <input type="checkbox"/>                              | d Left Ventricular Thrombus                                                                                                             |
| 4.                                              | Other Suggestive Underlying Cause                                       | <input type="checkbox"/>                              | e Dilated Cardiomyopathy                                                                                                                |
| <input type="checkbox"/>                        | a Evidence of Other Suggestive Underlying Cause                         | <input type="checkbox"/>                              | f Akinetic Left Ventricular Segment                                                                                                     |
| 5.                                              | Prior Specialized Tests                                                 | <input type="checkbox"/>                              | g Atrial Myxoma                                                                                                                         |
| <input type="checkbox"/>                        | a No Prior Specialized Tests                                            | <input type="checkbox"/>                              | h Infective Endocarditis                                                                                                                |
| <input type="checkbox"/>                        | b Negative Prior Specialized Tests                                      | 3.                                                    | RESULTS/MEDIUM-RISK SOURCE(S) for EMBOLI                                                                                                |
|                                                 | C C1 SPECIALIZED TESTS (Circle one or more response)                    | <input type="checkbox"/>                              | a Mitral Valve Prolapse                                                                                                                 |
| 1.                                              | Intrinsic Disorder with Arterial Wall Abnormality†                      | <input type="checkbox"/>                              | b Mitral Annular Calcification                                                                                                          |
| <input type="checkbox"/>                        | a Moyamoya Disease                                                      | <input type="checkbox"/>                              | c Mitral Stenosis without Atrial Fibrillation*                                                                                          |
| <input type="checkbox"/>                        | b Nonatherosclerotic vasculopathy                                       | <input type="checkbox"/>                              | d Left Atrial Turbulence (Smoke)                                                                                                        |
| <input type="checkbox"/>                        | c Dissection                                                            | <input type="checkbox"/>                              | e Atrial Septal Aneurysm                                                                                                                |
| 2.                                              | Iatrogenic Injury‡                                                      | <input type="checkbox"/>                              | f Patent Foramen Ovale                                                                                                                  |
| <input type="checkbox"/>                        | a Injury Caused by Endovascular Treatment to Clinically Relevant Artery | <input type="checkbox"/>                              | g Bioprosthetic Cardiac Valve                                                                                                           |
| 3.                                              | Disorders of Blood Composition‡                                         | <input type="checkbox"/>                              | h Nonbacterial Thrombotic Endocarditis                                                                                                  |
| <input type="checkbox"/>                        | a Disorder of Hemostatic System                                         | <input type="checkbox"/>                              | i Congestive Heart Failure                                                                                                              |
| 4.                                              | Other Suggestive Underlying Cause                                       | <input type="checkbox"/>                              | j Hypokinetic Left Ventricular Segment                                                                                                  |
| <input type="checkbox"/>                        | a Evidence of Other Suggestive Underlying Cause                         | 4.                                                    | RESULTS/COMPLETENESS of WORK-UP                                                                                                         |
| 5.                                              | Specialized Tests During Hospitalization                                | <input type="checkbox"/>                              | a RESULTS/INCOMPLETE WORK-UP or NOT DONE                                                                                                |
| <input type="checkbox"/>                        | a Not Done                                                              |                                                       |                                                                                                                                         |
| <input type="checkbox"/>                        | b Negative Specialized Tests                                            |                                                       |                                                                                                                                         |
|                                                 |                                                                         |                                                       | B5 DIAGNOSTIC TESTS/CARDIAC RHYTHM (Circle one or more response)                                                                        |
|                                                 |                                                                         | 1.                                                    | TESTS/HOLTER                                                                                                                            |
|                                                 |                                                                         | <input type="checkbox"/>                              | a TESTS/ECG                                                                                                                             |
|                                                 |                                                                         | 2.                                                    | HOLTER                                                                                                                                  |
|                                                 |                                                                         | <input type="checkbox"/>                              | a ECG                                                                                                                                   |
|                                                 |                                                                         | 2.                                                    | RESULTS/HIGH-RISK SOURCE(S) for EMBOLI                                                                                                  |
|                                                 |                                                                         | <input type="checkbox"/>                              | a RESULTS/HIGH-RISK SOURCE(S) for EMBOLI                                                                                                |
|                                                 |                                                                         | <input type="checkbox"/>                              | a Atrial Fibrillation† (other than lone atrial fibrillation)                                                                            |
|                                                 |                                                                         | <input type="checkbox"/>                              | b Sick Sinus Syndrome†                                                                                                                  |
|                                                 |                                                                         | 3.                                                    | RESULTS/MEDIUM-RISK SOURCE(S) for EMBOLI                                                                                                |
|                                                 |                                                                         | <input type="checkbox"/>                              | a RESULTS/MEDIUM-RISK SOURCE(S) for EMBOLI                                                                                              |
|                                                 |                                                                         | <input type="checkbox"/>                              | a Atrial Flutter†                                                                                                                       |
|                                                 |                                                                         | <input type="checkbox"/>                              | b Lone Atrial Fibrillation†                                                                                                             |
|                                                 |                                                                         | 4.                                                    | RESULTS/COMPLETENESS of WORK-UP                                                                                                         |
|                                                 |                                                                         | <input type="checkbox"/>                              | a RESULTS/COMPLETENESS of WORK-UP                                                                                                       |
|                                                 |                                                                         | <input type="checkbox"/>                              | a RESULTS/INCOMPLETE WORK-UP or NOT DONE                                                                                                |

\* Discovered in A.History and/or B.Diagnostic Tests  
† Demonstrated at any Time During Hospitalization  
‡ During Hospitalization
