# Supplementary material
Source: HighWire-hosted journal article supplement (https://svn.smart01.highwire.org/content/5/4/337)

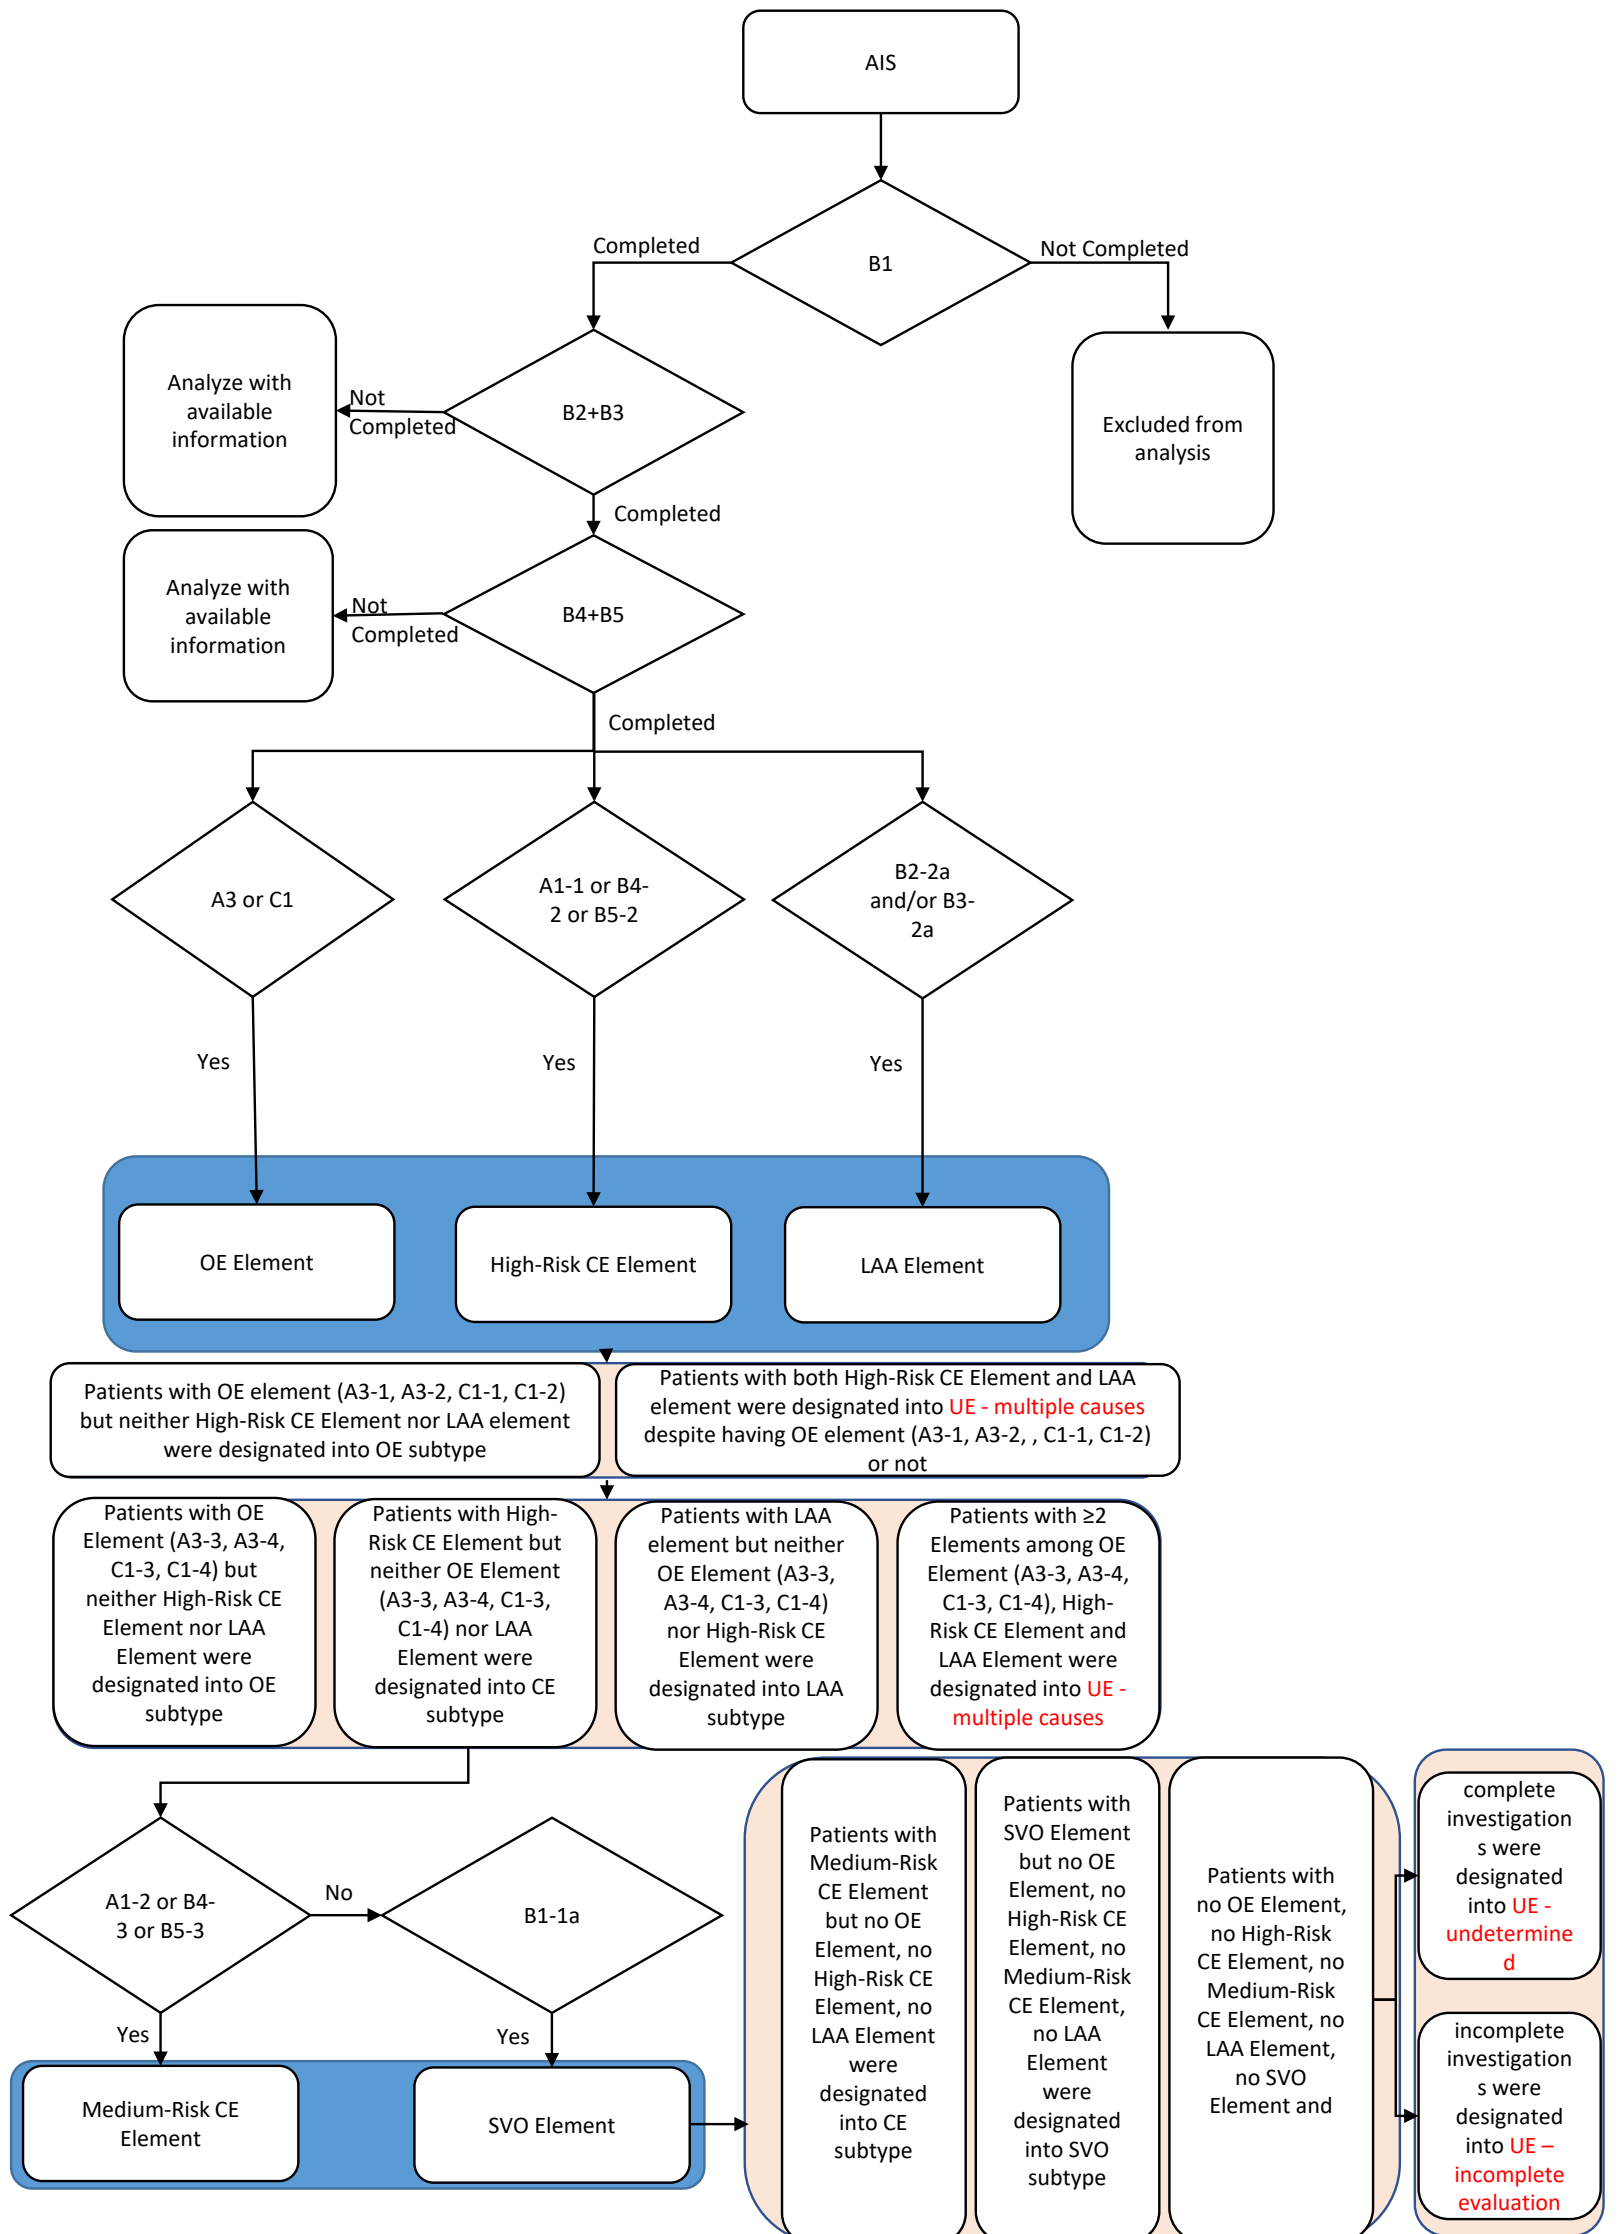

Supplement: inline-supplementary-material-2 [file inline-supplementary-material-2.pdf]
